# Supplementary material for: JAK and mTOR inhibitors prevent cytokine release while retaining T cell bispecific antibody in vivo efficacy
Source: PubMed Central journal article supplement — J Immunother Cancer. 2022 Jan 21;10(1):e003766. doi: 10.1136/jitc-2021-003766 (PMC8785208; doi:10.1136/jitc-2021-003766), 2022-01-21
Supplement: jitc-2021-003766supp002.pdf [file jitc-2021-003766supp002.pdf]

## JAK and mTOR inhibitors prevent cytokine release while retaining T cell bispecific antibody in vivo efficacy

Gabrielle Leclercq, H el ene Haegel, Alberto Toso, Tina Zimmermann, Luke Green, Nathalie Steinhoff, Johannes Sam, Vesna Pulko, Anneliese Schneider, Anna-Maria Giusti, John Challier, Anne Freimoser-Grundschober, Laurent Larivi ere, Alex Odermatt, Martin Stern, Pablo Uma a, Marina Bacac, Christian Klein

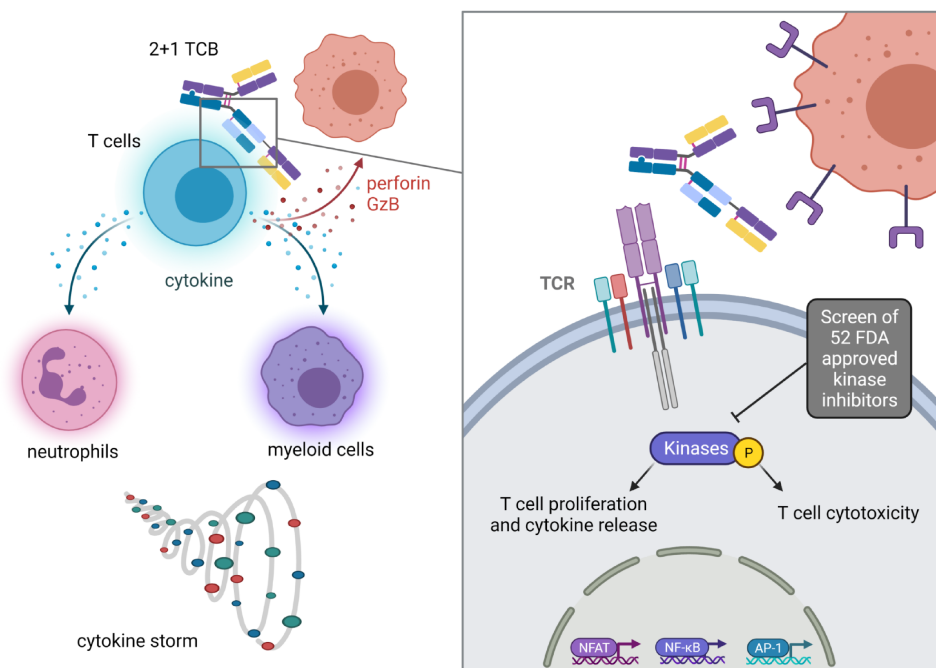

### Key points

- Targeting JAK, mTOR and Src pathways reveals the uncoupling of TCB-induced T cell cytotoxicity and cytokine release.
- mTOR and JAK inhibitors prevent TCB-mediated cytokine release upon first infusion while preserving TCB-efficacy.

### correspondance

[gabrielle.leclercq@roche.com](mailto:gabrielle.leclercq@roche.com)
